# Supplementary material for: Comparisons of Ramie and Corn Stover Silages: Effects on Chewing Activity, Rumen Fermentation, Microbiota and Methane Emissions in Goats
Source: MDPI journal article supplement (doi:10.3390/fermentation8090432), 2022-09-01
Supplement: s1 [file s1]

**Table S1.** The primers (forward and reverse) of the selected microbial groups for qPCR.

| Microbial Groups *               | Sequence (5'→3')                                                    | Size (bp) | References |
|----------------------------------|---------------------------------------------------------------------|-----------|------------|
| Bacteria                         | F: CGGCAACGAGCGCAACCC<br>R: CCATTGTAGCACGTGTGTAGCC                  | 146       | [69]       |
| Protozoa                         | F: GCTTTCGWTGGTAGTGTATT<br>R: CTTGCCCTCYAATCGTWCT                   | 223       | [70]       |
| Fungi                            | F: GAGGAAGTAAAAGTCGTAACAAGGTTTC<br>R: CAAATTCACAAAGGGTAGGATGATT     | 120       | [69]       |
| Methanogens                      | F: GGATTAGATACCCSGGTAGT<br>R: GTTGARTCCAATTAAACCGCA                 | 192       | [71]       |
| Selected groups of bacteria      |                                                                     |           |            |
| <i>Ruminococcus albus</i>        | F: CCCTAAAAGCAGTCTTAGTTCG<br>R: CCTCCTTGCGTTAGAACA                  | 176       | [72]       |
| <i>Ruminococcus flavefaciens</i> | F: CGAACGGAGATAATTTGAGTTTACTTAGG<br>R: CGGTCTCTGTATGTTATGAGGTATTACC | 132       | [69]       |
| <i>Fibrobacter ccinogenes</i>    | F: GTTCGGAATTACTGGGCGTAAA<br>R: CGCCTGCCCCTGAACTATC                 | 121       | [69]       |
| <i>Selenomonas ruminantium</i>   | F: CAATAAGCATTCCGCCTGGG<br>R: TTCACTCAATGTCAAGCCCTGG                | 138       | [73]       |
| <i>Prevotella ruminicola</i>     | F: GAAAGTCGGATTAATGCTCTATGTTG<br>R: CATCCTATAGCGGTAAACCTTTGG        | 74        | [73]       |
| <i>Prevotella</i>                | F: GGTTCTGAGAGGAAGGTCCTCC<br>R: TCCTGCACGCTACTTGGCTG                | 121       | [73]       |
| <i>Ruminobacter amylophilus</i>  | F: CTGGGGAGCTGCCTGAATG<br>R: GCATCTGAATGCGACTGGTTG                  | 102       | [73]       |

\* F = forward; R = reverse.

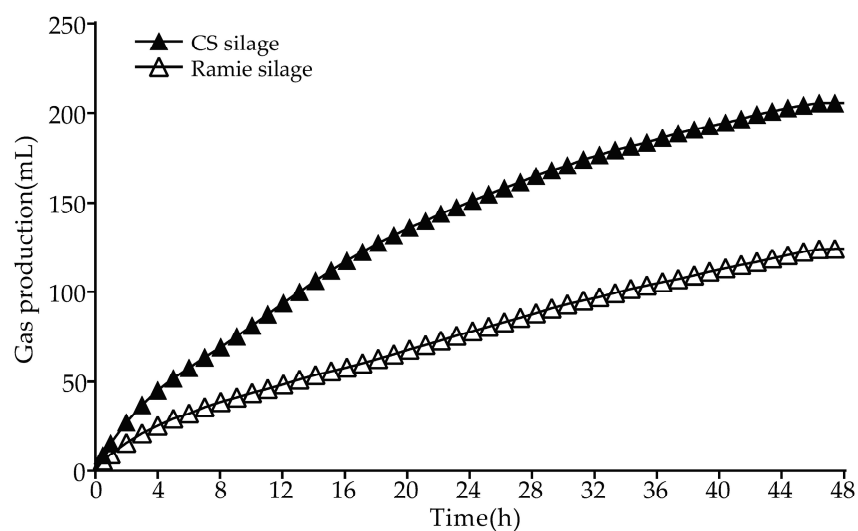

**Figure S1.** *In vitro* fermentation total gas production of corn stover (CS) silage or ramie silage after 48-h in vitro ruminal batch incubation (n = 3).

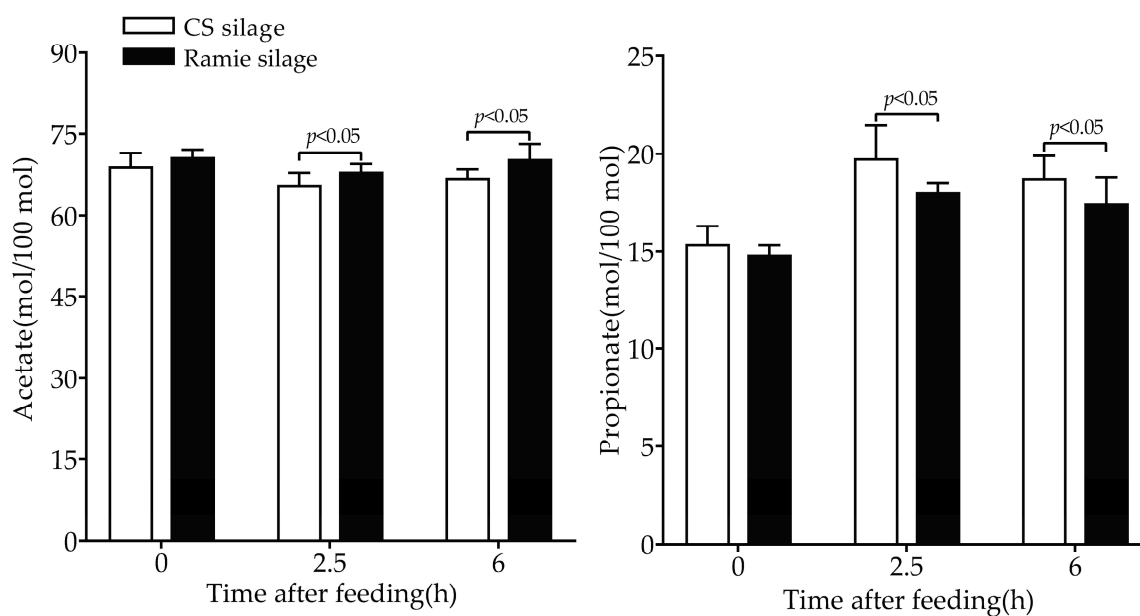

**Figure S2.** Acetate and propionate molar concentration in rumen fluid collected at 0, 2.5 and 6 h after morning feeding in goats fed with corn stover (CS) silage or ramie silage diets (n = 8). Means with different letters differ ( $p \leq 0.05$ ). Error bars = SEM.
